# Supplementary material
Source: HighWire-hosted journal article supplement (https://bmjopensem.bmj.com/content/5/1/e000586)
Supplement: inline-supplementary-material-2 [file inline-supplementary-material-2.pdf]

| Knee feature                      | Knee side | Marathon runners (n=142 knees) |        |               |       |         |                | Non-marathon runners (n=22 knees) |        |               |       |         |         |
|-----------------------------------|-----------|--------------------------------|--------|---------------|-------|---------|----------------|-----------------------------------|--------|---------------|-------|---------|---------|
|                                   |           | Lesioned Knee                  |        | Post-M Lesion |       |         | Change         | Lesioned Knee                     |        | Post-M Lesion |       |         | Change  |
|                                   |           | Pre-M                          | Post-M | New           | Worse | Improve | p-value        | Pre-M                             | Post-M | New           | Worse | Improve | p-value |
| <b>Meniscal tears in knees</b>    |           | 51                             | 52     | 1             | 0     | 0       |                | 6                                 | 6      | 0             | 0     | 0       |         |
| AH                                | Medial    | 5                              | 5      | 0             | 0     | 0       | N/A            | 1                                 | 1      | 0             | 0     | 0       | N/A     |
|                                   | Lateral   | 3                              | 3      | 0             | 0     | 0       | N/A            | 0                                 | 0      | 0             | 0     | 0       | N/A     |
| PH                                | Medial    | 52                             | 53     | 1             | 0     | 0       | > 0.999        | 6                                 | 6      | 0             | 0     | 0       | N/A     |
|                                   | Lateral   | 3                              | 3      | 0             | 0     | 0       | N/A            | 0                                 | 0      | 0             | 0     | 0       | N/A     |
| <b>Meniscal signal in knees</b>   |           | 23                             | 23     | 0             | 0     | 0       |                | 5                                 | 5      | 0             | 0     | 0       |         |
| AH                                | Medial    | 0                              | 0      | 0             | 0     | 0       | N/A            | 0                                 | 0      | 0             | 0     | 0       | N/A     |
|                                   | Lateral   | 3                              | 3      | 0             | 0     | 0       | N/A            | 0                                 | 0      | 0             | 0     | 0       | N/A     |
| PH                                | Medial    | 19                             | 19     | 0             | 0     | 0       | N/A            | 5                                 | 5      | 0             | 0     | 0       | N/A     |
|                                   | Lateral   | 4                              | 4      | 0             | 0     | 0       | N/A            | 0                                 | 0      | 0             | 0     | 0       | N/A     |
| <b>Cartilage lesions in knees</b> |           | 92                             | 95     | 6             | 14    | 2       |                | 15                                | 15     | 0             | 3     | 0       |         |
| Patella                           | Medial    | 57                             | 61     | 4             | 2     | 1       | 0.078          | 11                                | 11     | 0             | 3     | 0       | 0.250   |
|                                   | Lateral   | 41                             | 48     | 7             | 5     | 0       | <b>0.0005*</b> | 8                                 | 8      | 0             | 0     | 0       | N/A     |
| Trochlea                          | Medial    | 4                              | 5      | 1             | 0     | 0       | > 0.999        | 0                                 | 0      | 0             | 0     | 0       | N/A     |
|                                   | Central   | 11                             | 11     | 0             | 0     | 0       | N/A            | 1                                 | 1      | 0             | 0     | 0       | N/A     |
|                                   | Lateral   | 5                              | 7      | 2             | 0     | 0       | 0.500          | 0                                 | 0      | 0             | 0     | 0       | N/A     |
| Femur                             | Medial    | 23                             | 23     | 0             | 0     | 1       | > 0.999        | 5                                 | 5      | 0             | 1     | 0       | > 0.999 |
|                                   | Lateral   | 13                             | 13     | 0             | 1     | 0       | > 0.999        | 3                                 | 3      | 0             | 0     | 0       | N/A     |
| Tibia                             | Medial    | 6                              | 7      | 1             | 0     | 0       | > 0.999        | 2                                 | 2      | 0             | 0     | 0       | N/A     |
|                                   | Lateral   | 8                              | 10     | 2             | 0     | 0       | 0.500          | 0                                 | 0      | 0             | 0     | 0       | N/A     |
| <b>BME in knees</b>               |           | 58                             | 60     | 8             | 15    | 16      |                | 9                                 | 8      | 2             | 0     | 3       |         |
| Patella                           | Medial    | 20                             | 24     | 5             | 0     | 1       | 0.094          | 4                                 | 5      | 1             | 0     | 1       | > 0.999 |
|                                   | Lateral   | 21                             | 26     | 5             | 1     | 1       | 0.469          | 3                                 | 4      | 1             | 0     | 0       | > 0.999 |
| Trochlea                          | Medial    | 3                              | 7      | 4             | 1     | 0       | 0.063          | 0                                 | 1      | 1             | 0     | 0       | > 0.999 |
|                                   | Central   | 5                              | 6      | 1             | 0     | 0       | > 0.999        | 0                                 | 0      | 0             | 0     | 0       | N/A     |
|                                   | Lateral   | 6                              | 7      | 1             | 1     | 0       | 0.500          | 1                                 | 1      | 0             | 0     | 0       | N/A     |
| Femur                             | Medial    | 18                             | 11     | 1             | 0     | 9       | 0.082          | 3                                 | 2      | 0             | 0     | 1       | > 0.999 |
|                                   | Lateral   | 6                              | 6      | 2             | 0     | 2       | > 0.999        | 2                                 | 2      | 0             | 0     | 1       | > 0.999 |
| Tibia                             | Medial    | 15                             | 7      | 1             | 1     | 10      | <b>0.011*</b>  | 2                                 | 2      | 0             | 0     | 0       | N/A     |
|                                   | Lateral   | 8                              | 10     | 2             | 0     | 0       | 0.500          | 1                                 | 1      | 0             | 0     | 0       | N/A     |
| <b>BC in knees</b>                |           | 30                             | 32     | 1             | 3     | 1       |                | 4                                 | 5      | 1             | 0     | 1       |         |
| Patella                           | Medial    | 7                              | 8      | 1             | 0     | 0       | > 0.999        | 3                                 | 3      | 0             | 0     | 1       | > 0.999 |
|                                   | Lateral   | 8                              | 9      | 1             | 0     | 1       | > 0.999        | 2                                 | 2      | 0             | 0     | 0       | N/A     |
| Trochlea                          | Medial    | 3                              | 3      | 0             | 0     | 0       | > 0.999        | 0                                 | 0      | 0             | 0     | 0       | N/A     |
|                                   | Central   | 3                              | 3      | 0             | 0     | 0       | N/A            | 0                                 | 0      | 0             | 0     | 0       | N/A     |
|                                   | Lateral   | 3                              | 4      | 1             | 0     | 0       | > 0.999        | 0                                 | 0      | 0             | 0     | 0       | N/A     |
| Femur                             | Medial    | 3                              | 4      | 1             | 0     | 0       | > 0.999        | 1                                 | 1      | 0             | 0     | 0       | N/A     |
|                                   | Lateral   | 3                              | 3      | 0             | 0     | 0       | N/A            | 0                                 | 0      | 0             | 0     | 0       | N/A     |
| Tibia                             | Medial    | 4                              | 5      | 1             | 0     | 0       | > 0.999        | 1                                 | 1      | 0             | 0     | 0       | N/A     |

|                                     |         |    |    |    |   |   |                    |    |    |   |   |   |        |
|-------------------------------------|---------|----|----|----|---|---|--------------------|----|----|---|---|---|--------|
|                                     | Lateral | 4  | 5  | 1  | 0 | 0 | > 0.999            | 0  | 0  | 0 | 0 | 0 | N/A    |
| <b>Tendons lesions in knees</b>     |         | 60 | 65 | 6  | 4 | 1 |                    | 5  | 7  | 2 | 0 | 0 |        |
| Patellar                            |         | 31 | 34 | 3  | 0 | 1 | 0.500              | 5  | 7  | 2 | 0 | 0 | 0.500  |
| Quadriceps                          |         | 21 | 21 | 0  | 0 | 0 | N/A                | 1  | 1  | 0 | 0 | 0 | N/A    |
| Semimembranosus                     |         | 14 | 20 | 6  | 1 | 0 | <b>0.016*</b>      | 3  | 3  | 0 | 0 | 0 | N/A    |
| Sartorius                           |         | 1  | 2  | 1  | 0 | 0 | > 0.999            | 1  | 1  | 0 | 0 | 0 | N/A    |
| Gracilis                            |         | 5  | 7  | 2  | 0 | 1 | > 0.999            | 2  | 2  | 0 | 0 | 0 | N/A    |
| <b>Ligamentous lesions in knees</b> |         | 59 | 58 | 1  | 1 | 2 |                    | 7  | 7  | 0 | 0 | 0 |        |
| ACL                                 |         | 55 | 55 | 0  | 0 | 0 | N/A                | 6  | 6  | 0 | 0 | 0 | N/A    |
| PCL                                 |         | 0  | 0  | 0  | 0 | 0 | N/A                | 0  | 0  | 0 | 0 | 0 | N/A    |
| MCL                                 |         | 4  | 2  | 0  | 0 | 2 | 0.500              | 2  | 2  | 0 | 0 | 0 | N/A    |
| LCL                                 |         | 2  | 4  | 2  | 0 | 0 | 0.500              | 0  | 0  | 0 | 0 | 0 | N/A    |
| ITBFS in knees                      |         | 3  | 18 | 15 | 0 | 0 | <b>&lt;0.0001*</b> | 1  | 1  | 1 | 0 | 1 | >0.999 |
| Joint effusion in knees             |         | 74 | 74 | 0  | 0 | 0 | N/A                | 11 | 11 | 0 | 0 | 0 | N/A    |
| Prepatellar bursitis in knees       |         | 35 | 42 | 7  | 0 | 0 | <b>0.016*</b>      | 6  | 7  | 1 | 0 | 0 | >0.999 |
| Pes anserine bursitis knees         |         | 11 | 14 | 4  | 0 | 1 | 0.375              | 0  | 0  | 0 | 0 | 0 | N/A    |
| Hoffa's synovitis in knees          |         | 30 | 30 | 0  | 0 | 0 | N/A                | 8  | 8  | 0 | 0 | 0 | N/A    |
| Baker's cyst in knees               |         | 48 | 53 | 5  | 0 | 0 | 0.0625             | 9  | 9  | 0 | 0 | 0 | N/A    |
| Other ganglion cysts in knees       |         | 32 | 33 | 2  | 0 | 1 | >0.999             | 2  | 2  | 0 | 0 | 0 | N/A    |
| PMC lesions in knees                |         | 15 | 16 | 2  | 0 | 1 | >0.999             | 2  | 2  | 0 | 0 | 0 | N/A    |
| PLC lesions in knees                |         | 0  | 0  | 0  | 0 | 0 | N/A                | 0  | 0  | 0 | 0 | 0 | N/A    |

**Table 1: Number of knees lesioned in different structures before and after the marathon/training, in marathon runners (142 knees) and non-marathon runners (22 knees) - and number of post-marathon lesions by type of change (new, worsened, improved).** Comparisons were done between the number of knees with lesions before and after the marathon. The knees for which the presence of a lesion/signal hyperintensity was demonstrated were counted, irrespective of the severity of lesions. All abnormalities were recorded including Grade 1 abnormalities (all grades different from 0 were defined as 'lesions'). Pre-M, pre-marathon; Post-M, post-marathon; AH, anterior horn of the meniscus; PH, posterior horn of the meniscus; BME, subchondral bone marrow oedema; BC, subchondral bone cyst; ACL, anterior cruciate ligament; PCL, posterior cruciate ligament; MCL, medial collateral ligament; PLC, lateral collateral ligament; ITBFS, iliotibial band friction

syndrome; PMC, postero-medial corner; PLC, postero-lateral corner; \*p-values<0.05 indicate significant changes in the knees between the pre- and post-marathon time points; The number of lesions in subjects, in knees and in all sides of the structures/total lesions (medial/central/lateral) were calculated. N/A: Not Applicable.
