# Supplementary material
Source: HighWire-hosted journal article supplement (https://bmjopensem.bmj.com/content/5/1/e000586)
Supplement: inline-supplementary-material-7 [file inline-supplementary-material-7.pdf]

| Pre- to Post-M           | Change in grade | Cartilage 0-4 |           | Bone 0-3 |           | Tendons 0-3 |           | Ligaments 0-3 |          |
|--------------------------|-----------------|---------------|-----------|----------|-----------|-------------|-----------|---------------|----------|
|                          |                 | M             | Non-M     | M        | Non-M     | M           | Non-M     | M             | Non-M    |
| New/worse lesions        | 0 to 1          | 7             | 0         | 9        | 2         | 8           | 2         | 1             | 0        |
|                          | 0 to 2          | 4             | 0         | 9        | 1         | 4           | 0         | 1             | 0        |
|                          | 0 to 3          | 5             | 0         | 4        | 0         | 0           | 0         | 0             | 0        |
|                          | 0 to 4          | 1             | 0         | 0        | 0         | 0           | 0         | 0             | 0        |
|                          | 1 to 2          | 4             | 1         | 0        | 0         | 1           | 0         | 0             | 0        |
|                          | 2 to 3          | 2             | 1         | 4        | 0         | 0           | 0         | 0             | 0        |
|                          | 2 to 4          | 0             | 1         | 0        | 0         | 0           | 0         | 0             | 0        |
|                          | 3 to 4          | 2             | 1         | 0        | 0         | 0           | 0         | 0             | 0        |
|                          | <b>Total</b>    |               | <b>25</b> | <b>4</b> | <b>26</b> | <b>3</b>    | <b>13</b> | <b>2</b>      | <b>2</b> |
| Mean Change in amplitude |                 | 1.6           | 1         | 1.7      | 1.3       | 1.3         | 1         | 1.5           | 0        |
| Improved lesions         | 1 to 0          | 0             | 0         | 9        | 0         | 0           | 0         | 2             | 0        |
|                          | 2 to 0          | 0             | 0         | 11       | 1         | 0           | 0         | 0             | 0        |
|                          | 2 to 1          | 0             | 0         | 1        | 1         | 1           | 0         | 0             | 0        |
|                          | 3 to 0          | 0             | 0         | 0        | 0         | 0           | 0         | 0             | 0        |
|                          | 3 to 1          | 0             | 0         | 2        | 0         | 0           | 0         | 0             | 0        |
|                          | 3 to 2          | 0             | 0         | 0        | 1         | 1           | 0         | 0             | 0        |
|                          | 4 to 0          | 0             | 0         | 0        | 0         | 0           | 0         | 0             | 0        |
|                          | 4 to 1          | 0             | 0         | 0        | 0         | 0           | 0         | 0             | 0        |
|                          | 4 to 2          | 1             | 0         | 0        | 0         | 0           | 0         | 0             | 0        |
|                          | 4 to 3          | 1             | 0         | 0        | 0         | 0           | 0         | 0             | 0        |
|                          | <b>Total</b>    |               | <b>2</b>  | <b>0</b> | <b>23</b> | <b>3</b>    | <b>2</b>  | <b>0</b>      | <b>2</b> |
| Mean Change in amplitude |                 | -1.5          | 0         | -1.6     | -1.3      | -1          | 0         | -1            | 0        |

**Table 1:** Change in lesion grade/score (severity) from Pre-to Post Marathon in cartilage, subchondral bone marrow (oedema), tendons and ligaments, in marathon runners (n=71, 142 knees) and non-marathon runners who dropped out during training (n=11, 22 knees). M, marathon (runner).
